# Supplementary material for: Targeted Quantification of Carbon Metabolites Identifies Metabolic Progression Markers and an Undiagnosed Case of SDH-Deficient Clear Cell Renal Cell Carcinoma in a German Cohort
Source: MDPI journal article supplement (doi:10.3390/metabo11110764), 2021-11-09

## Supplementary Figure S1

Spearman correlation matrix of measured metabolites from 318 samples with complete measurements of all 13 metabolites. Cis-aconitate (CisAC) and isocitrate (IsoCA) correlate with citrate (CA), malate (MAL) correlates with fumarate (FUM). Cis-aconitate, isocitrate, and malate were not used for further analyses.

Article

### Targeted quantification of carbon metabolites identifies metabolic progression markers and an undiagnosed case of SDH-deficient clear cell renal cell carcinoma in a German cohort

Doreen William<sup>1</sup>, Kati Erdmann<sup>2,3,4</sup>, Jonas Ottemöller<sup>2</sup>, Anastasios Mangelis<sup>5</sup>, Catleen Conrad<sup>6</sup>, Mirko Peitzsch<sup>6</sup>, Evelin Schröck<sup>1,7</sup>, Graeme Eisenhofer<sup>6,8</sup>, Aristeidis Zacharis<sup>2</sup>, Susanne Füssel<sup>2,3</sup>, Daniela Aust<sup>1,9</sup>, Barbara Klink<sup>1,7,10</sup>, Susan Richter<sup>6\*</sup>

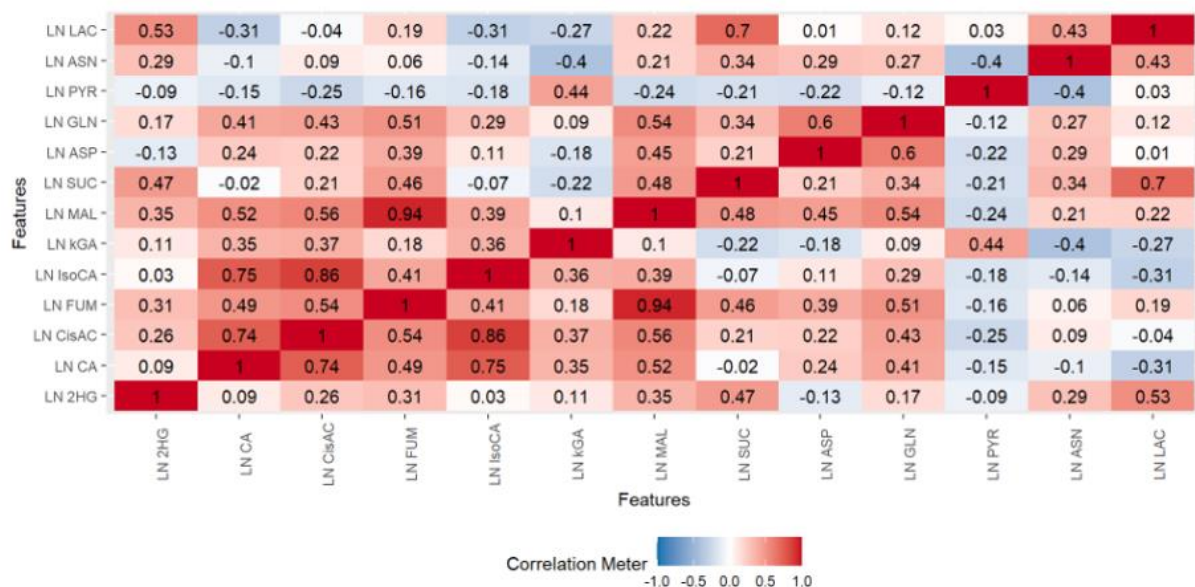

## Supplementary Figure S2

Significantly different metabolites between lower (pT1/2) and higher (pT3/4) primary pathological tumour stage across the entire sample set, n = 419, except for pyruvate n = 399 and lactate n = 338. Significance was assessed by Mann-Whitney U test.

Article

### Targeted quantification of carbon metabolites identifies metabolic progression markers and an undiagnosed case of SDH-deficient clear cell renal cell carcinoma in a German cohort

Doreen William<sup>1</sup>, Kati Erdmann<sup>2,3,4</sup>, Jonas Ottemöller<sup>2</sup>, Anastasios Mangelis<sup>5</sup>, Catleen Conrad<sup>6</sup>, Mirko Peitzsch<sup>6</sup>, Evelin Schröck<sup>1,7</sup>, Graeme Eisenhofer<sup>6,8</sup>, Aristeidis Zacharis<sup>2</sup>, Susanne Füssel<sup>2,3</sup>, Daniela Aust<sup>1,9</sup>, Barbara Klink<sup>1,7,10</sup>, Susan Richter<sup>6\*</sup>

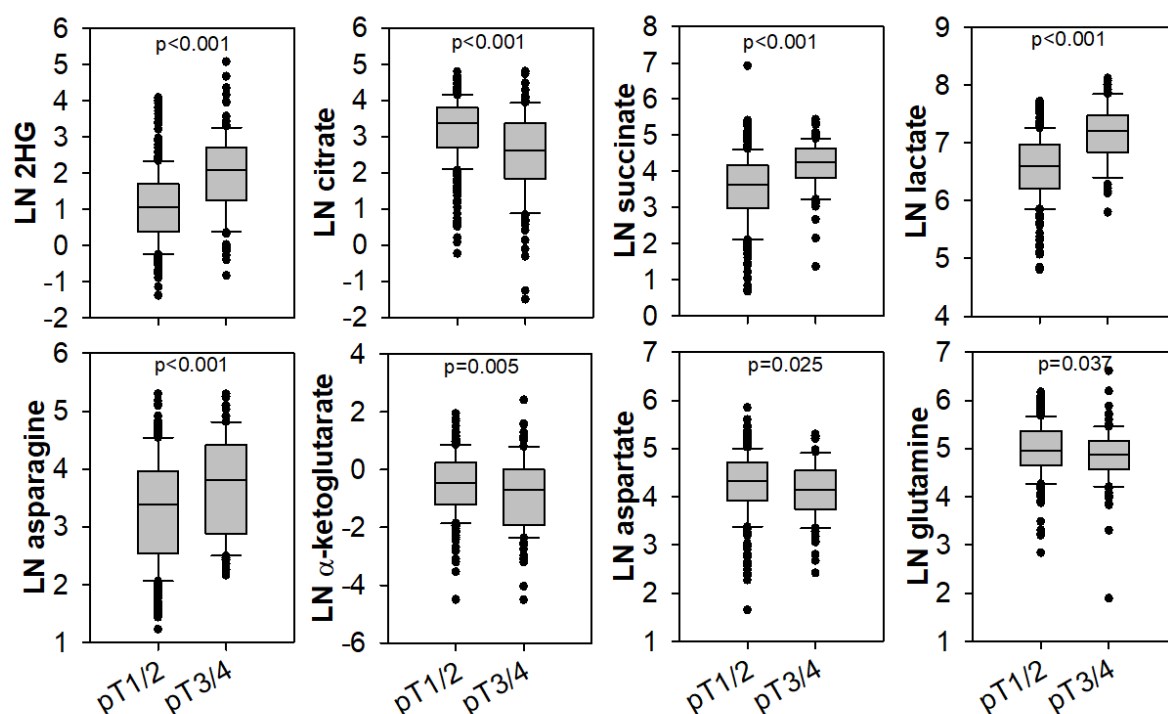

## Supplementary Figure S3

Significantly different metabolites between lower (I/II) and higher (III/IV) TNM stage in RCCs across the entire sample set, n = 405, except for pyruvate n = 385 and lactate n = 328. Significance was assessed by Mann-Whitney U test.

Article

### Targeted quantification of carbon metabolites identifies metabolic progression markers and an undiagnosed case of SDH-deficient clear cell renal cell carcinoma in a German cohort

Doreen William<sup>1</sup>, Kati Erdmann<sup>2,3,4</sup>, Jonas Ottemöller<sup>2</sup>, Anastasios Mangelis<sup>5</sup>, Catleen Conrad<sup>6</sup>, Mirko Peitzsch<sup>6</sup>, Evelin Schröck<sup>1,7</sup>, Graeme Eisenhofer<sup>6,8</sup>, Aristeidis Zacharis<sup>2</sup>, Susanne Füssel<sup>2,3</sup>, Daniela Aust<sup>1,9</sup>, Barbara Klink<sup>1,7,10</sup>, Susan Richter<sup>6\*</sup>

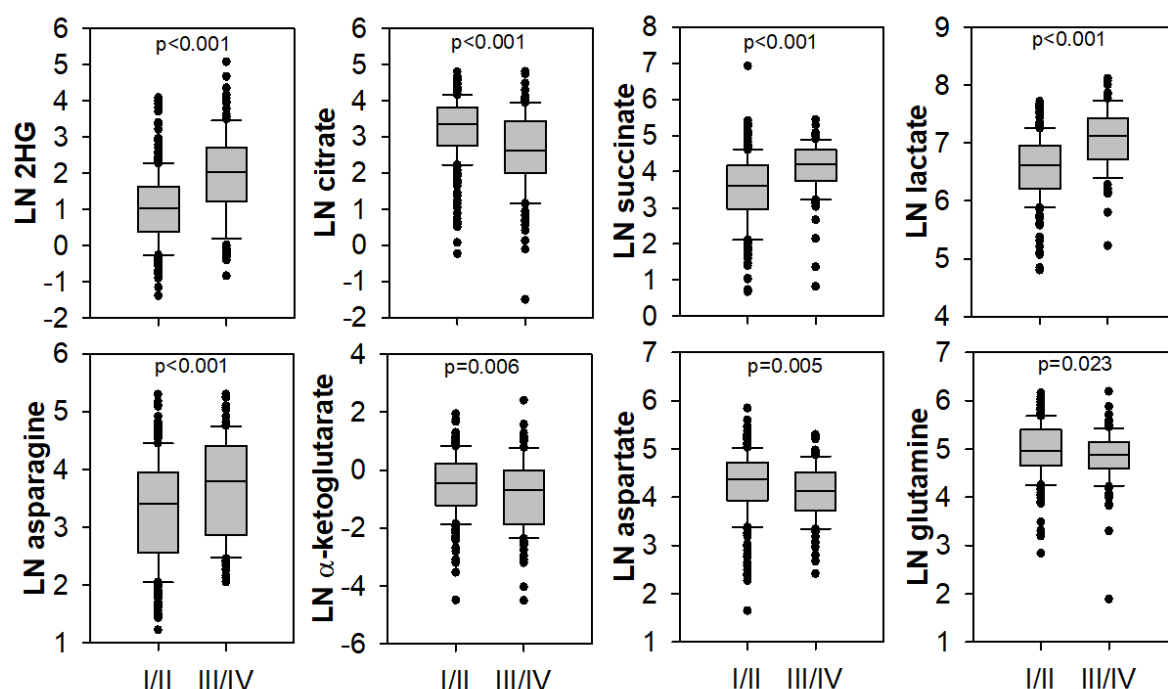

## Supplementary Figure S4

Metabolite changes in necrotic (YES) versus non-necrotic (NO) RCC tissue. Significance was assessed by Mann-Whitney U test, n = 419, except for lactate n = 338.

Article

### Targeted quantification of carbon metabolites identifies metabolic progression markers and an undiagnosed case of SDH-deficient clear cell renal cell carcinoma in a German cohort

Doreen William<sup>1</sup>, Kati Erdmann<sup>2,3,4</sup>, Jonas Ottemöller<sup>2</sup>, Anastasios Mangelis<sup>5</sup>, Catleen Conrad<sup>6</sup>, Mirko Peitzsch<sup>6</sup>, Evelin Schröck<sup>1,7</sup>, Graeme Eisenhofer<sup>6,8</sup>, Aristeidis Zacharis<sup>2</sup>, Susanne Füssel<sup>2,3</sup>, Daniela Aust<sup>1,9</sup>, Barbara Klink<sup>1,7,10</sup>, Susan Richter<sup>6\*</sup>

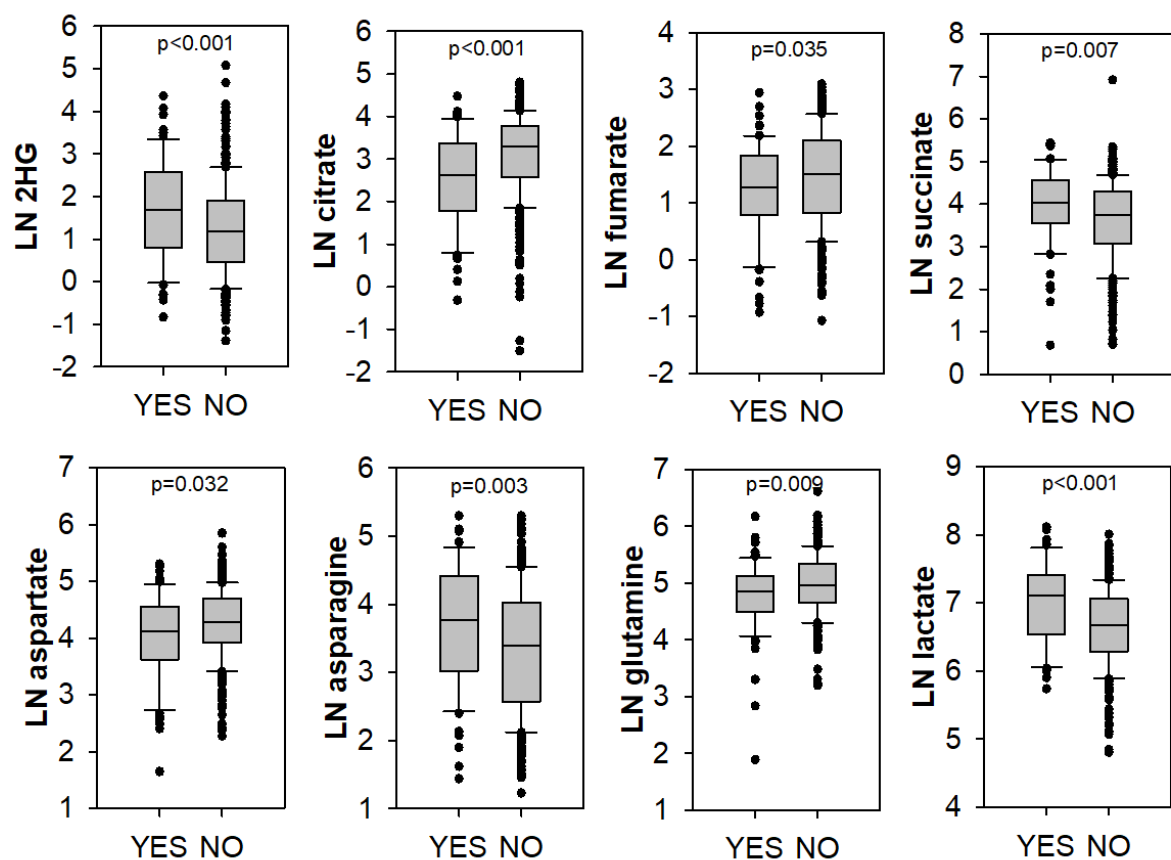

## Supplementary Figure S5

Mosaic plot depicting the proportion of primary tumour stages in necrotic and non-necrotic samples. The difference between the necrotic and non-necrotic group is significant by chi-square test,  $p < 0.001$ .

Article

### Targeted quantification of carbon metabolites identifies metabolic progression markers and an undiagnosed case of SDH-deficient clear cell renal cell carcinoma in a German cohort

Doreen William<sup>1</sup>, Kati Erdmann<sup>2,3,4</sup>, Jonas Ottemöller<sup>2</sup>, Anastasios Mangelis<sup>5</sup>, Catleen Conrad<sup>6</sup>, Mirko Peitzsch<sup>6</sup>, Evelin Schröck<sup>1,7</sup>, Graeme Eisenhofer<sup>6,8</sup>, Aristeidis Zacharis<sup>2</sup>, Susanne Füssel<sup>2,3</sup>, Daniela Aust<sup>1,9</sup>, Barbara Klink<sup>1,7,10</sup>, Susan Richter<sup>6\*</sup>

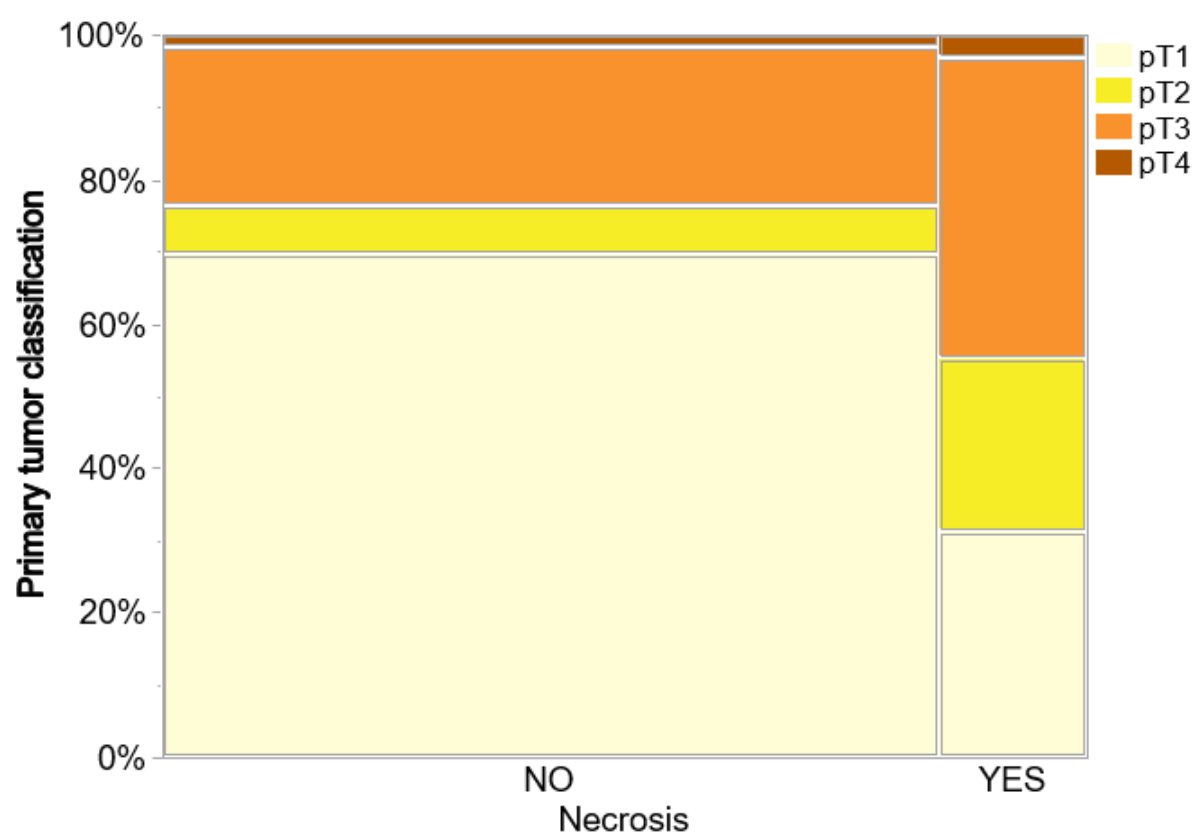

## Supplementary Figure S6

Unsupervised hierarchical clustering of metabolites excluding necrotic samples. Colour coding: Necrosis – yes (black), no (grey); Primary tumour stage (pT) and TNM stage – darker is a higher stage; Type – CC (light green), P (dark green), CHR (olive), mixed type (grey).

Article

### Targeted quantification of carbon metabolites identifies metabolic progression markers and an undiagnosed case of SDH-deficient clear cell renal cell carcinoma in a German cohort

Doreen William<sup>1</sup>, Kati Erdmann<sup>2,3,4</sup>, Jonas Ottemöller<sup>2</sup>, Anastasios Mangelis<sup>5</sup>, Catleen Conrad<sup>6</sup>, Mirko Peitzsch<sup>6</sup>, Evelin Schröck<sup>1,7</sup>, Graeme Eisenhofer<sup>6,8</sup>, Aristeidis Zacharis<sup>2</sup>, Susanne Füssel<sup>2,3</sup>, Daniela Aust<sup>1,9</sup>, Barbara Klink<sup>1,7,10</sup>, Susan Richter<sup>6\*</sup>

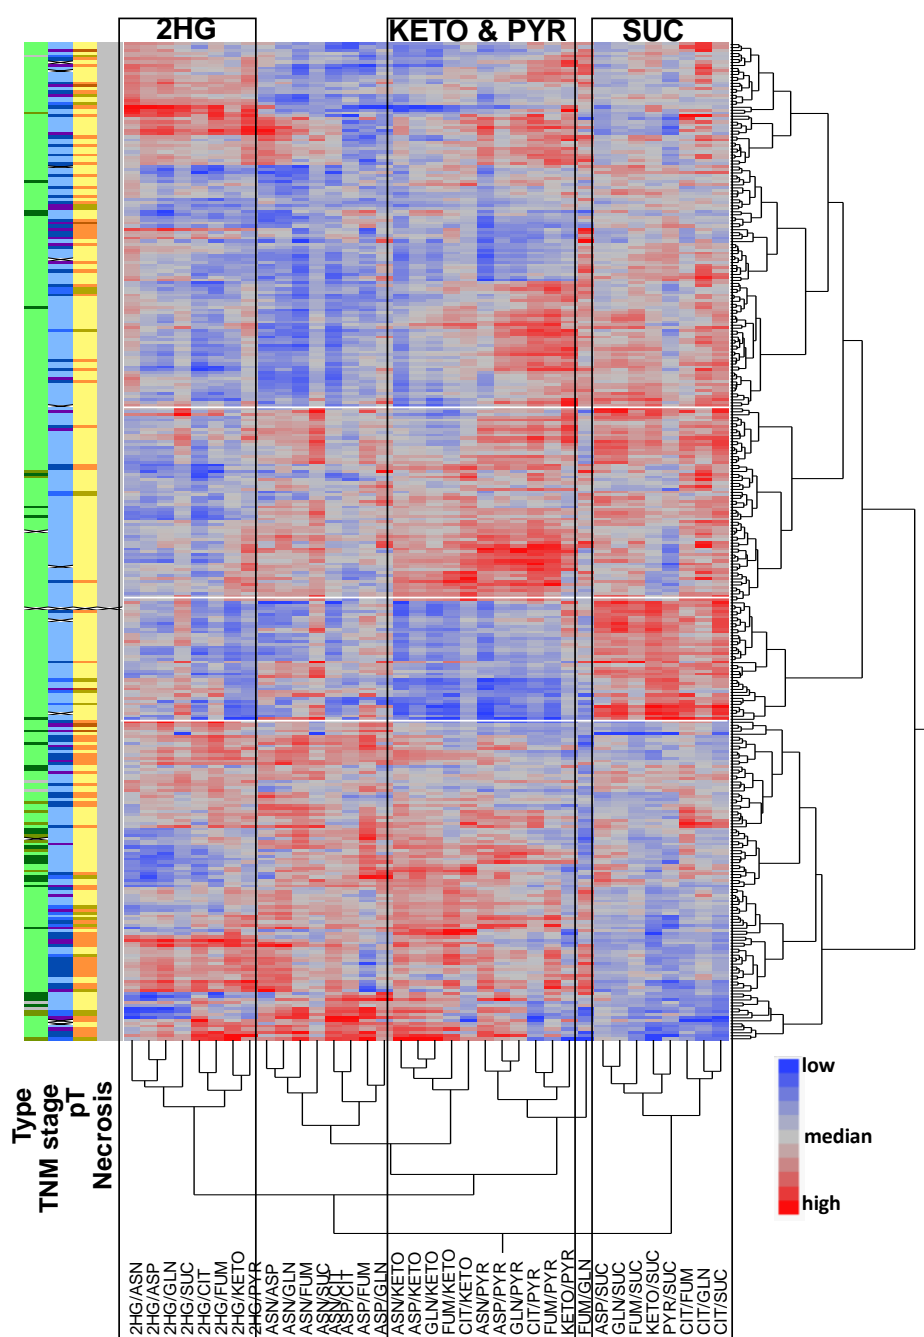

## Supplementary Figure S7

Internal validation receiver operating characteristics (ROC) curves for all analytes' classification with the bootstrap forest algorithm between low-TNM-tumours (red lines) and high-TNM-tumours (blue lines). Area under the curve (AUC) score is displayed for all analytes within plots. Training and validation sets were split randomly by 70% and 30% of the original dataset using weighted cross validation.

Article

### Targeted quantification of carbon metabolites identifies metabolic progression markers and an undiagnosed case of SDH-deficient clear cell renal cell carcinoma in a German cohort

Doreen William<sup>1</sup>, Kati Erdmann<sup>2,3,4</sup>, Jonas Ottemöller<sup>2</sup>, Anastasios Mangelis<sup>5</sup>, Catleen Conrad<sup>6</sup>, Mirko Peitzsch<sup>6</sup>, Evelin Schröck<sup>1,7</sup>, Graeme Eisenhofer<sup>6,8</sup>, Aristeidis Zacharis<sup>2</sup>, Susanne Füssel<sup>2,3</sup>, Daniela Aust<sup>1,9</sup>, Barbara Klink<sup>1,7,10</sup>, Susan Richter<sup>6\*</sup>

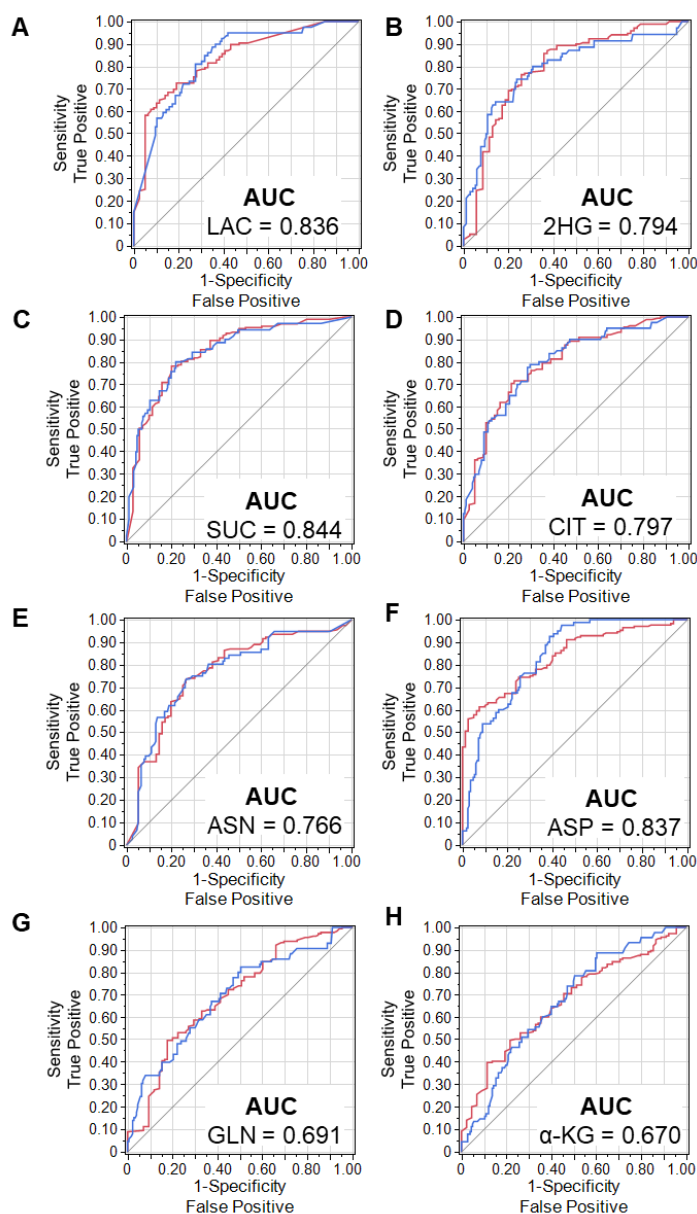

## Supplementary Figure S8

Survival analyses for risk assessment based on tumour metabolite levels of lactate (A), succinate (B), 2HG (C), and citrate (D). The figures show probability of disease-specific deaths (which does not include relapse) over time. Metabolite-based predictions were made by the bootstrap forest algorithm, and CSS (n=266) was plotted. Univariable Cox proportional hazards models were used for calculation of hazard ratios (HR) with significance levels at \* $p < 0.05$  and \*\* $p < 0.001$ .

Article

### Targeted quantification of carbon metabolites identifies metabolic progression markers and an undiagnosed case of SDH-deficient clear cell renal cell carcinoma in a German cohort

Doreen William<sup>1</sup>, Kati Erdmann<sup>2,3,4</sup>, Jonas Ottemöller<sup>2</sup>, Anastasios Mangelis<sup>5</sup>, Catleen Conrad<sup>6</sup>, Mirko Peitzsch<sup>6</sup>, Evelin Schröck<sup>1,7</sup>, Graeme Eisenhofer<sup>6,8</sup>, Aristeidis Zacharis<sup>2</sup>, Susanne Füssel<sup>2,3</sup>, Daniela Aust<sup>1,9</sup>, Barbara Klink<sup>1,7,10</sup>, Susan Richter<sup>6\*</sup>

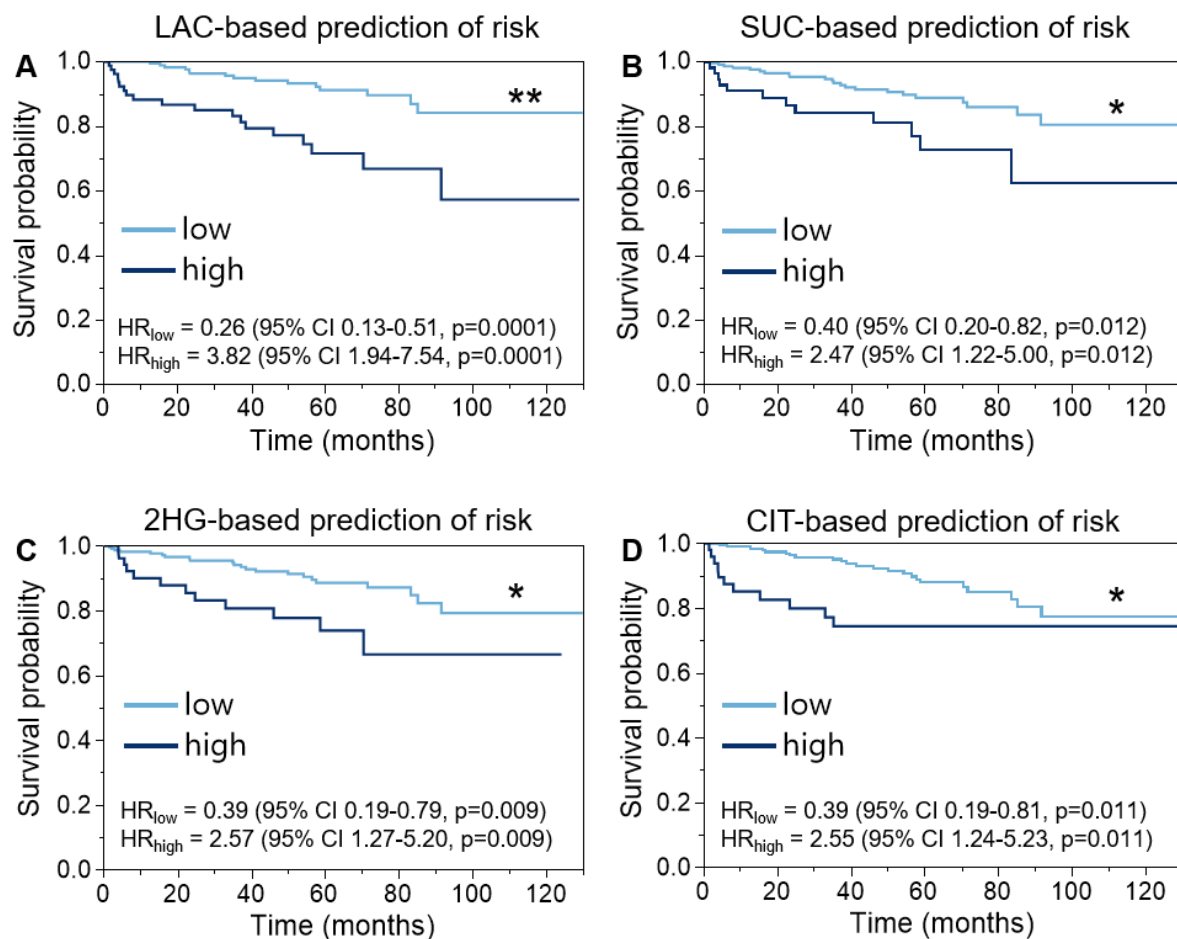



## Supplementary Figure S9

ROC curves with areas under the curve (AUC) for the bootstrap forest models predicting risk based on tissue metabolites (n = 405). A'-D'. These predictions for a high or low risk tumour were analysed in respect to CSS (lower panels, n=266); aspartate (ASP, A, A'), asparagine (ASN, B, B'), glutamine (GLN, C, C'), and  $\alpha$ -ketoglutarate ( $\alpha$ -KG, D, D'). Statistical difference was assessed by log rank test, and significance was considered at \*p<0.05. HR – hazard ratios according to Cox proportional hazards model.

Article

## Targeted quantification of carbon metabolites identifies metabolic progression markers and an undiagnosed case of SDH-deficient clear cell renal cell carcinoma in a German cohort

Doreen William<sup>1</sup>, Kati Erdmann<sup>2,3,4</sup>, Jonas Ottemöller<sup>2</sup>, Anastasios Mangelis<sup>5</sup>, Catleen Conrad<sup>6</sup>, Mirko Peitzsch<sup>6</sup>, Evelin Schröck<sup>1,7</sup>, Graeme Eisenhofer<sup>6,8</sup>, Aristeidis Zacharis<sup>2</sup>, Susanne Füssel<sup>2,3</sup>, Daniela Aust<sup>1,9</sup>, Barbara Klink<sup>1,7,10</sup>, Susan Richter<sup>6\*</sup>

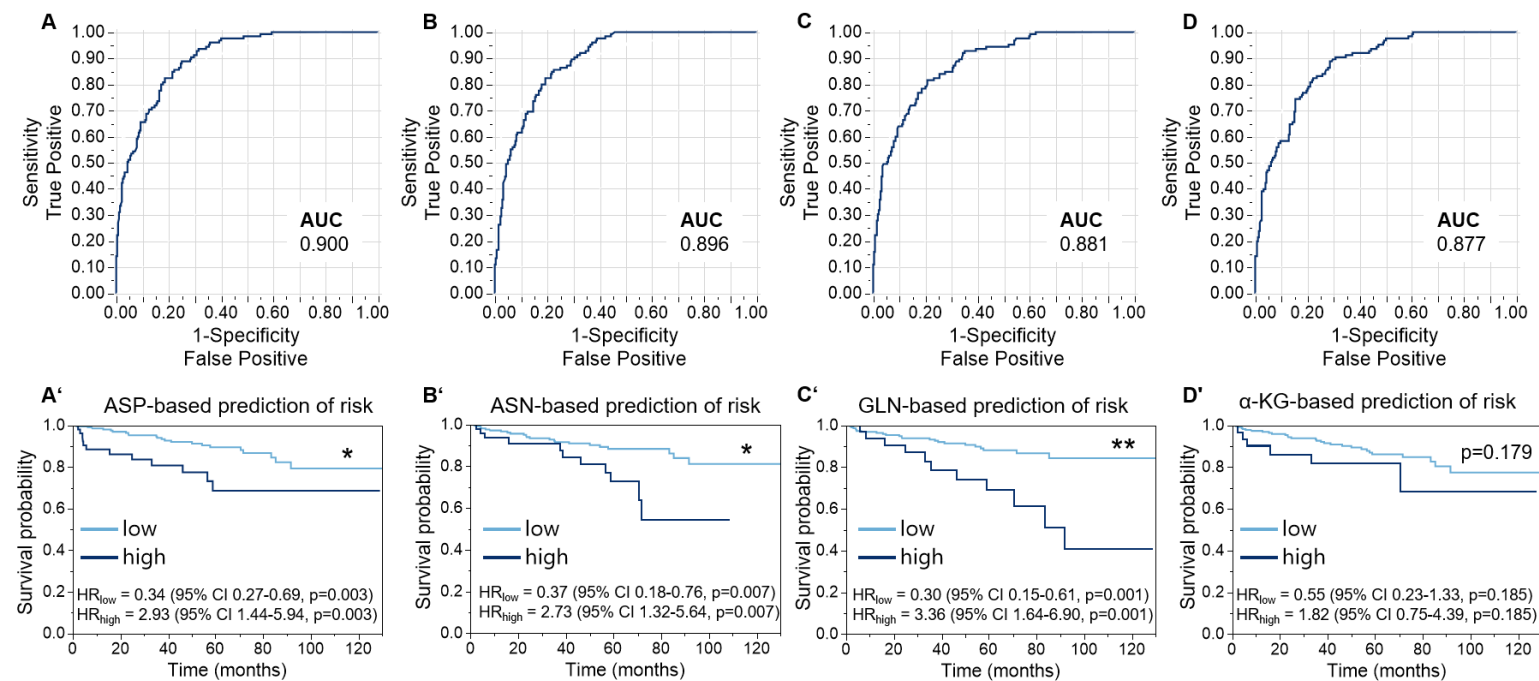

## Supplementary Figure S10

Succinate (A) and  $\alpha$ -ketoglutarate (B) levels in papRCC type 1 (P1, n=18) versus type 2 (P2, n=15). In five papRCC the type was not differentiated. Statistical significance was assessed by rank sum test.

Article

### Targeted quantification of carbon metabolites identifies metabolic progression markers and an undiagnosed case of SDH-deficient clear cell renal cell carcinoma in a German cohort

Doreen William<sup>1</sup>, Kati Erdmann<sup>2,3,4</sup>, Jonas Ottemöller<sup>2</sup>, Anastasios Mangelis<sup>5</sup>, Catleen Conrad<sup>6</sup>, Mirko Peitzsch<sup>6</sup>, Evelin Schröck<sup>1,7</sup>, Graeme Eisenhofer<sup>6,8</sup>, Aristeidis Zacharis<sup>2</sup>, Susanne Füssel<sup>2,3</sup>, Daniela Aust<sup>1,9</sup>, Barbara Klink<sup>1,7,10</sup>, Susan Richter<sup>6\*</sup>

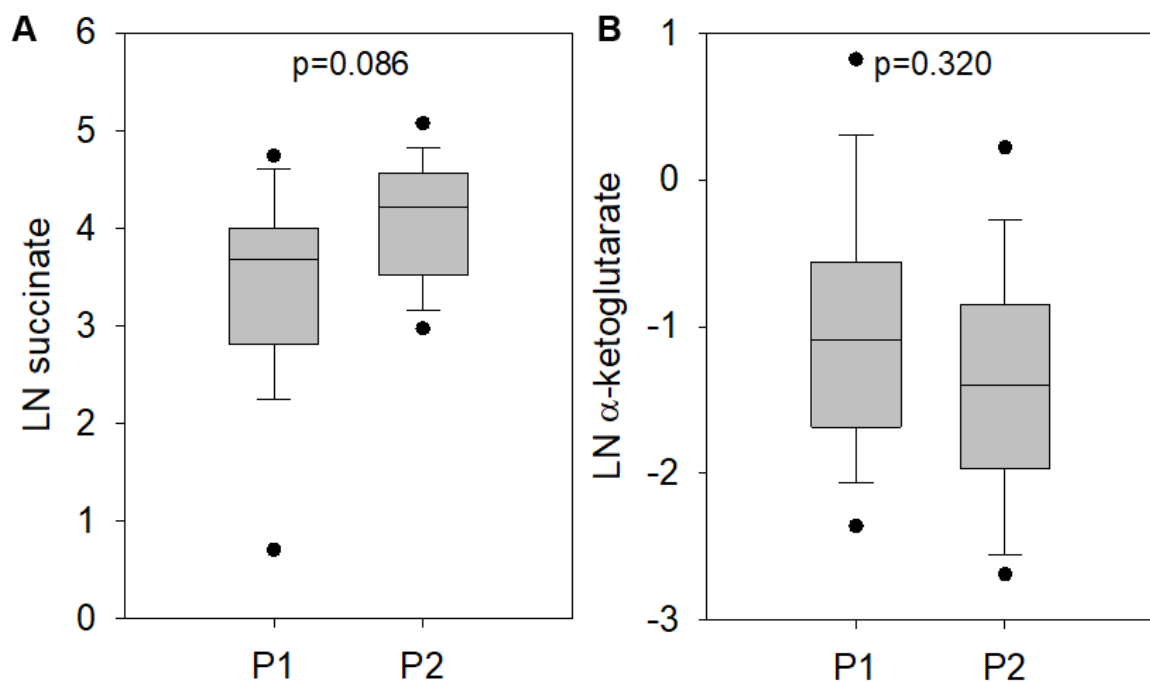

Supplement: s1 [file s1]
